# Supplementary material for: Construction of heterostructured BiVO4-{010}/Ag plasmonic photocatalysts by multi-object synchronous optimization of the microstructure of BiVO4 for significantly enhanced visible light driven photocatalytic performance
Source: Royal Society of Chemistry journal article supplement (doi:10.1039/d3ce01023f), 2024-01-01
Supplement: d3ce01023f1.pdf [file d3ce01023f1.pdf]

## Supplementary Material

Construction of heterostructured BiVO<sub>4</sub>-{010}/Ag plasmonic photocatalysts by multi-objects synchronously optimizing microstructure of BiVO<sub>4</sub> for significantly enhanced visible-light driven photocatalytic performance

Wei Liu<sup>a</sup>, Shuang Wang<sup>b</sup>, Meixi Lin<sup>b</sup>, Haiqi Luo<sup>b</sup>, Luhuan Chen<sup>b</sup>, Honghui Teng<sup>c,d\*</sup>, Guosheng Zhao<sup>a\*</sup>

<sup>a</sup> *School of Basic Medical Sciences, Zhaoqing Medical College, Zhaoqing 526020, Guangdong, China*

<sup>b</sup> *School of Pharmacy, Zhaoqing Medical College, Zhaoqing 526020, Guangdong, China*

<sup>c</sup> *Key Laboratory of Preparation and Application of Environmental Friendly Materials (Jilin Normal University), Ministry of Education, Changchun 130103, Jilin, China*

<sup>d</sup> *College of Engineering, Jilin Normal University, Siping 136000, Jilin, China*

E-mail: [tenghonghui@163.com](mailto:tenghonghui@163.com) (H.H. Teng).

E-mail: [zhgsh790121@163.com](mailto:zhgsh790121@163.com) (G.S. Zhao);

---

\* Corresponding author. E-mail addresses: [tenghonghui@163.com](mailto:tenghonghui@163.com) (H.H. Teng); [zhgsh790121@163.com](mailto:zhgsh790121@163.com) (G.S. Zhao).

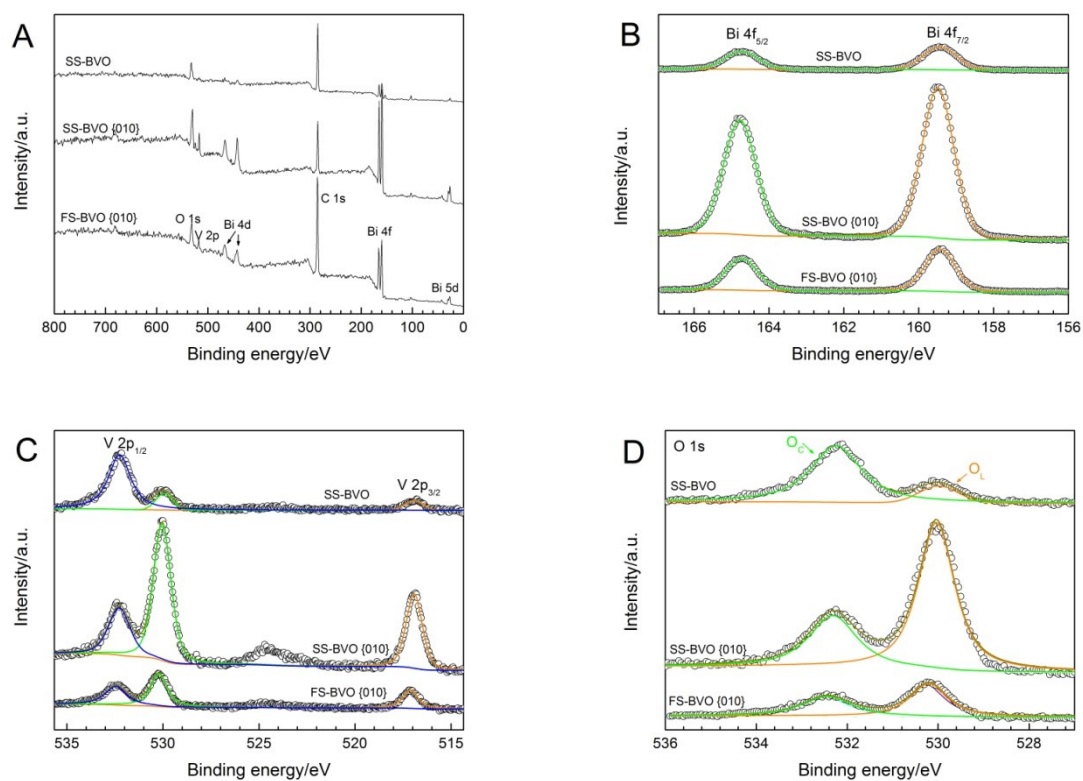

Fig. S1 XPS spectra of pure  $\text{BiVO}_4$  including (A) survey, (B) Bi 4f, (C) V 2p, (D) O 1s.

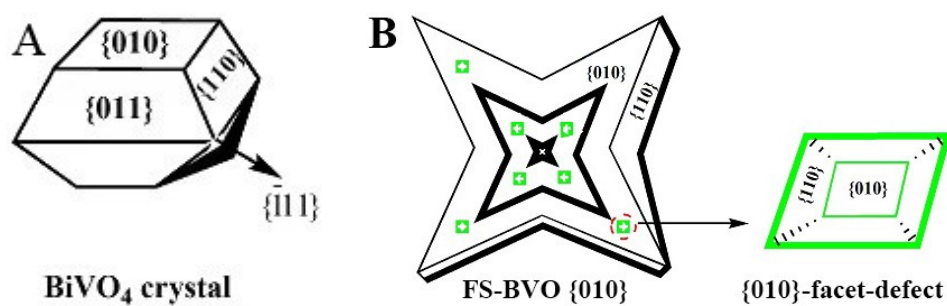

Fig. S2 Schematic illustrations for (A) decagonal  $\text{BiVO}_4$  crystal reported by Wang et al.<sup>52</sup> and (B) present FS-BVO  $\{010\}$ .

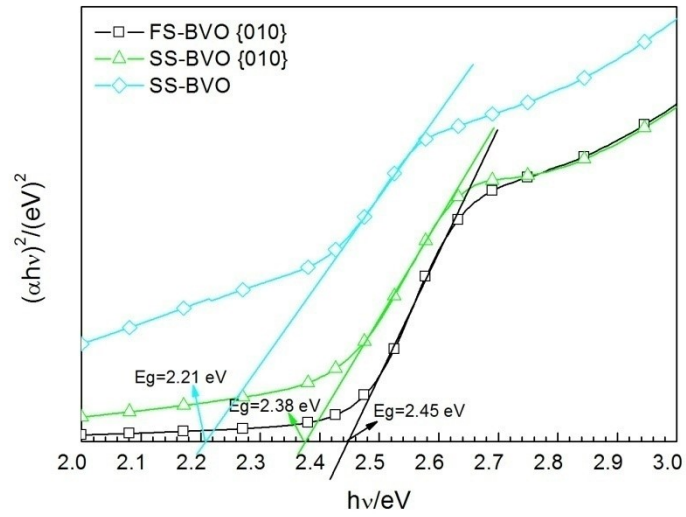

Fig. S3 Tauc plots of  $(\alpha h\nu)^2$  vs energy  $h\nu$  and band gap energy of pure  $\text{BiVO}_4$ .

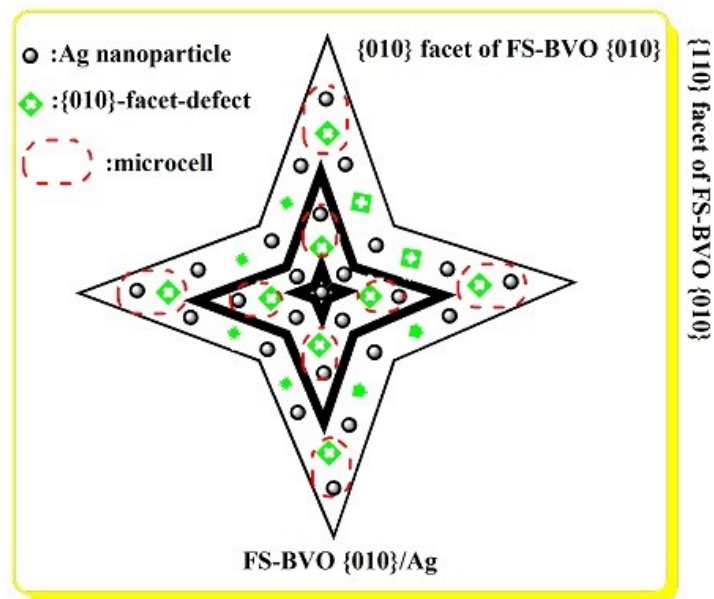

Fig. S4 Schematic illustration of microcells in single FS-BVO  $\{010\}$ /Ag particle.

Table S1 Summary of elemental compositions of BiVO<sub>4</sub>/Ag composites

| Sample          | Element content (atom%) |       |       |      | Atomic ratio        |
|-----------------|-------------------------|-------|-------|------|---------------------|
|                 | Bi                      | V     | O     | Ag   |                     |
| FS-BVO {010}/Ag | 10.5                    | 18.34 | 69.37 | 1.79 | 0.573:1:3.782:0.098 |
| SS-BVO {010}/Ag | 15.03                   | 25.61 | 59.15 | 0.21 | 0.587:1:2.310:0.008 |
| SS-BVO/Ag       | 16.6                    | 28.15 | 54.98 | 0.27 | 0.590:1:1.953:0.010 |

Table S2 Raman shifts and intensities of the vibrations of pure BiVO<sub>4</sub> and BiVO<sub>4</sub>/Ag composites

| Sample          | Band 1: external modes of VO <sub>4</sub> <sup>3-</sup> anions |           | Band 2: antisymmetric (B <sub>g</sub> ) V-O bending mode |           | Band 3: symmetric (A <sub>g</sub> ) V-O bending mode |           | Band 4: symmetric (A <sub>g</sub> ) V-O stretching mode |           |
|-----------------|----------------------------------------------------------------|-----------|----------------------------------------------------------|-----------|------------------------------------------------------|-----------|---------------------------------------------------------|-----------|
|                 | Wavenumbe                                                      | Intensity | Wavenumbe                                                | Intensity | Wavenumbe                                            | Intensity | Wavenumbe                                               | Intensity |
|                 | r /cm <sup>-1</sup>                                            |           | r /cm <sup>-1</sup>                                      |           | r /cm <sup>-1</sup>                                  |           | r /cm <sup>-1</sup>                                     |           |
| FS-BVO {010}    | 211.5                                                          | 8264      | 327                                                      | 3767      | 367.5                                                | 6557      | 826.5                                                   | 32717     |
| FS-BVO {010}/Ag | 211.5                                                          | 980       | 331.5                                                    | 874       | 364.5                                                | 695       | 822                                                     | 5251      |
| SS-BVO {010}    | 210                                                            | 1399      | 327                                                      | 823       | 367.5                                                | 1161      | 823.5                                                   | 6717      |
| SS-BVO {010}/Ag | 210                                                            | 492       | 331.5                                                    | 292       | 367.5                                                | 408       | 823.5                                                   | 2841      |
| SS-BVO          | 211.5                                                          | 584       | 325.5                                                    | 303       | 367.5                                                | 500       | 823.5                                                   | 2986      |
| SS-BVO /Ag      | 211.5                                                          | 332       | 328.5                                                    | 184       | 364.5                                                | 238       | 823.5                                                   | 1648      |
